# Supplementary material for: Bioremediation of uranium contaminated sites through the formation of U(vi) phosphate (bio)minerals
Source: Royal Society of Chemistry journal article supplement (doi:10.1039/d4ew00846d), 2025-01-01
Supplement: d4ew00846d1.pdf [file d4ew00846d1.pdf]

## **Supporting Information for Bioremediation of Uranium Contaminated Sites Through the Formation of U(VI) Phosphate (Bio)minerals**

Supporting information for manuscript, including geochemical modelling, aqueous geochemical data for Calder River water experiment, 16S rRNA sequencing, XAS data and XRD analysis of uranyl orthophosphate standard.

## Section S1. Geochemical Modelling Parameters and Results

Geochemical modelling was conducted using experimental aqueous data to determine the aqueous U and Ca speciation in the synthetic groundwater Ca-citrate/Na-phosphate, glycerol phosphate amended systems and sorption control. Additionally, the saturation index of U(VI) phosphates and amorphous calcium phosphates within amended experiments was also modelled. All calculations employed the PHREEQC version 3 geochemical modelling program,(1) using aqueous data from experimental systems with the ThermoChimie (V10a) database.(2) Table S1 gives the parameters used for modelling calculations alongside the background synthetic groundwater composition, taken from past work.(3) Solubility constants for U(VI) phosphates (chernikovite and autunite) (4) and complexation constants for U(VI)-glycerol phosphate were also modelled using relevant data from the literature.(5)

Table S1 Synthetic groundwater water composition and geochemical modelling parameters used for PHREEQC models of experiment systems.

| Ion                           | ppm   | mM   |
|-------------------------------|-------|------|
| Ca <sup>2+</sup>              | 27.73 | 0.69 |
| Mg <sup>2+</sup>              | 5.82  | 0.24 |
| K <sup>+</sup>                | 2.87  | 0.07 |
| Na <sup>+</sup>               | 35.19 | 1.53 |
| HCO <sub>3</sub> <sup>-</sup> | 60.03 | 0.98 |
| Cl <sup>-</sup>               | 53.79 | 1.51 |
| NO <sub>3</sub> <sup>-</sup>  | 19.98 | 0.32 |
| SO <sub>4</sub> <sup>2-</sup> | 25.18 | 0.26 |

| Experiment Model                                     | Geochemical Data Used |      |       |       |        |         | Result        |
|------------------------------------------------------|-----------------------|------|-------|-------|--------|---------|---------------|
| <b>Synthetic Groundwater Ca-citrate/Na-phosphate</b> |                       |      | mM    |       |        |         | Figure S1 (a) |
|                                                      | Days                  | pH   | Ca    | PO4   | U      | Citrate |               |
|                                                      | 0                     | 6.48 | 1.72  | 9.1   | 0.053  | 2.2     |               |
|                                                      | 1                     | 7.61 | 1.64  | 8.65  | 0.009  | 2.2     |               |
|                                                      | 3                     | 7.68 | 1.67  | 8.34  | 0.009  | 1.8     |               |
|                                                      | 7                     | 8.38 | 0.56  | 7.45  | 0.001  | 0       |               |
|                                                      | 14                    | 8.36 | 0.44  | 7.03  | 0.001  | 0       |               |
|                                                      | 21                    | 8.63 | 0.37  | 7.06  | 0.001  | 0       |               |
|                                                      | 31                    | 8.64 | 0.33  | 7.74  | 0.001  | 0       |               |
| <b>Synthetic Groundwater glycerol phosphate</b>      |                       |      | mM    |       |        |         | Figure S1 (b) |
|                                                      | Days                  | pH   | Ca    | PO4   | U      | GlyPO4  |               |
|                                                      | 0                     | 6.48 | 0.75  | 0     | 0.053  | 11.2    |               |
|                                                      | 1                     | 7.78 | 0.85  | 0.02  | 0.024  | 11.1    |               |
|                                                      | 3                     | 7.67 | 1.03  | 0.42  | 0.032  | 10.6    |               |
|                                                      | 7                     | 7.7  | 0.92  | 0.96  | 0.032  | 10.6    |               |
|                                                      | 14                    | 7.54 | 0.9   | 0.6   | 0.028  | 11.2    |               |
|                                                      | 21                    | 7.76 | 0.91  | 1.32  | 0.005  | 8.3     |               |
|                                                      | 31                    | 7.86 | 0.94  | 1.17  | 0.0013 | 7.8     |               |
| <b>Synthetic Sediment Only Control</b>               |                       |      | mM    |       |        |         | Figure S1 (c) |
|                                                      | Time / Days           | pH   | Ca    | U     |        |         |               |
|                                                      | 0                     | 6.48 | 0.87  | 0.053 |        |         |               |
|                                                      | 1                     | 6.94 | 0.95  | 0.009 |        |         |               |
|                                                      | 3                     | 6.64 | 0.98  | 0.006 |        |         |               |
|                                                      | 7                     | 6.63 | 0.89  | 0.005 |        |         |               |
|                                                      | 14                    | 6.69 | 1.06  | 0.003 |        |         |               |
|                                                      | 21                    | 6.67 | 0.96  | 0.003 |        |         |               |
| 31                                                   | 6.93                  | 1.08 | 0.003 |       |        |         |               |

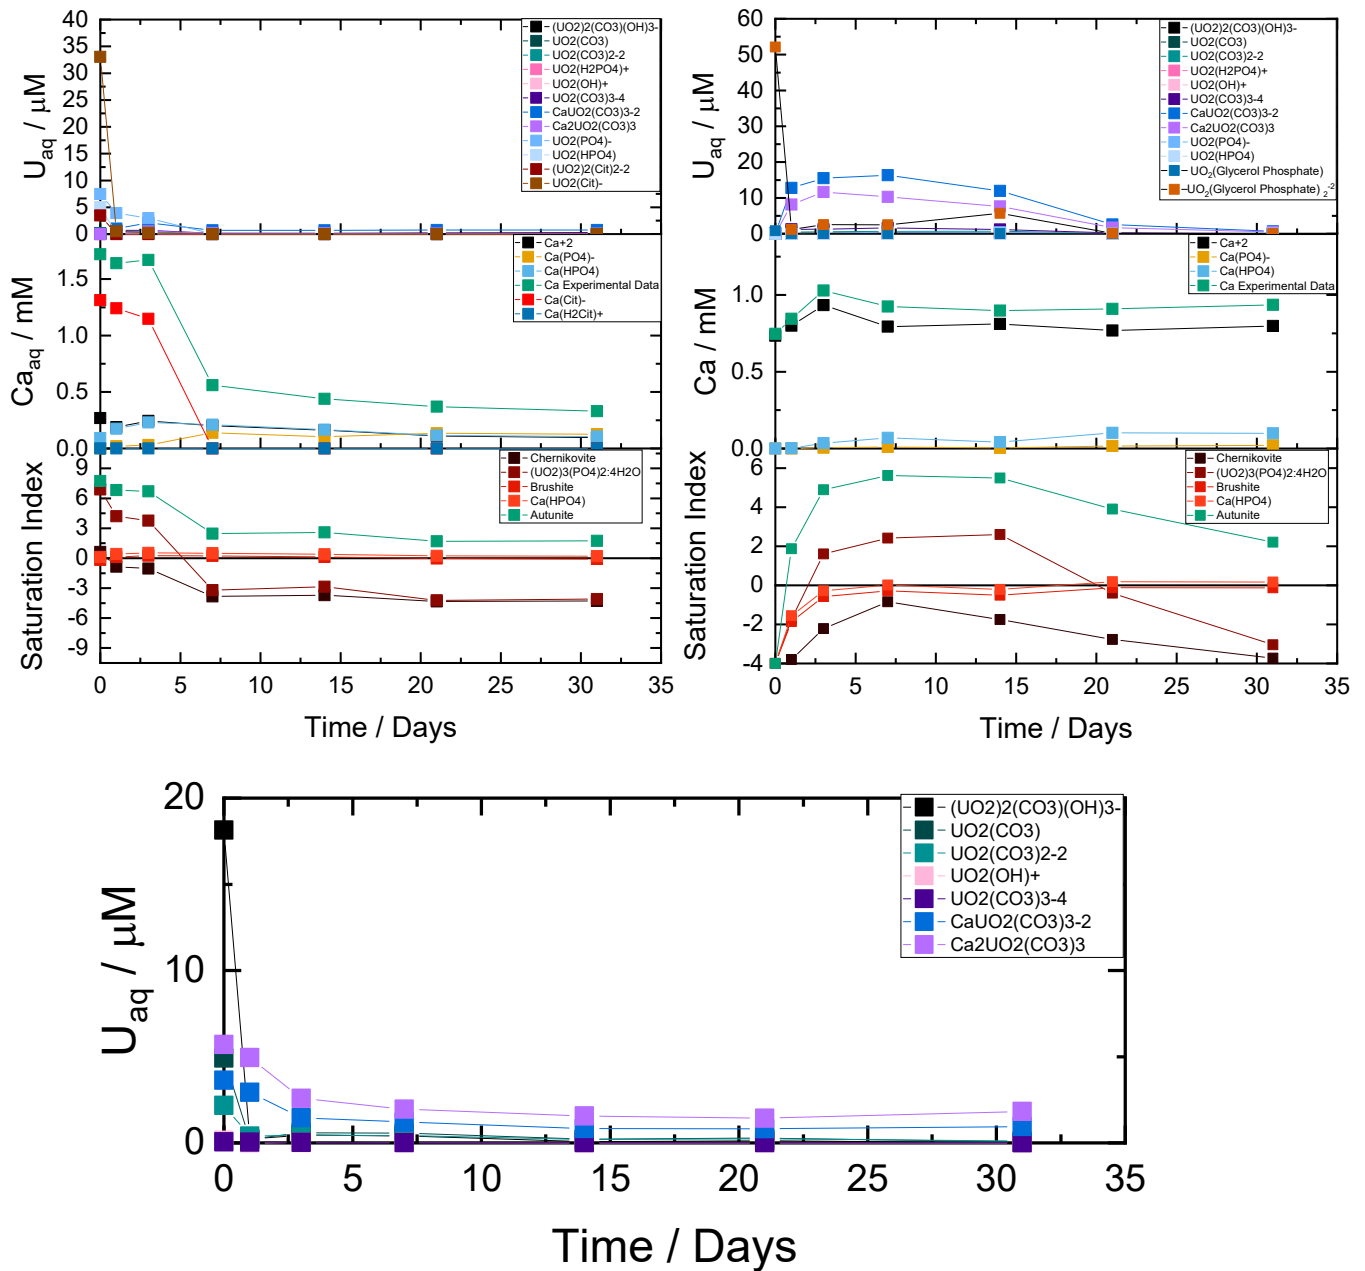

Figure S1 Geochemical model of the Ca and U speciation and saturation index for U(VI) phosphate and amorphous Ca-phosphate phase using aqueous data from synthetic groundwater (a) 1mM Ca<sup>2+</sup>, 2.5 mM citrate and 10 mM phosphate, (b) 10 mM glycerol phosphate. U speciation in (c) synthetic groundwater sediment only control.

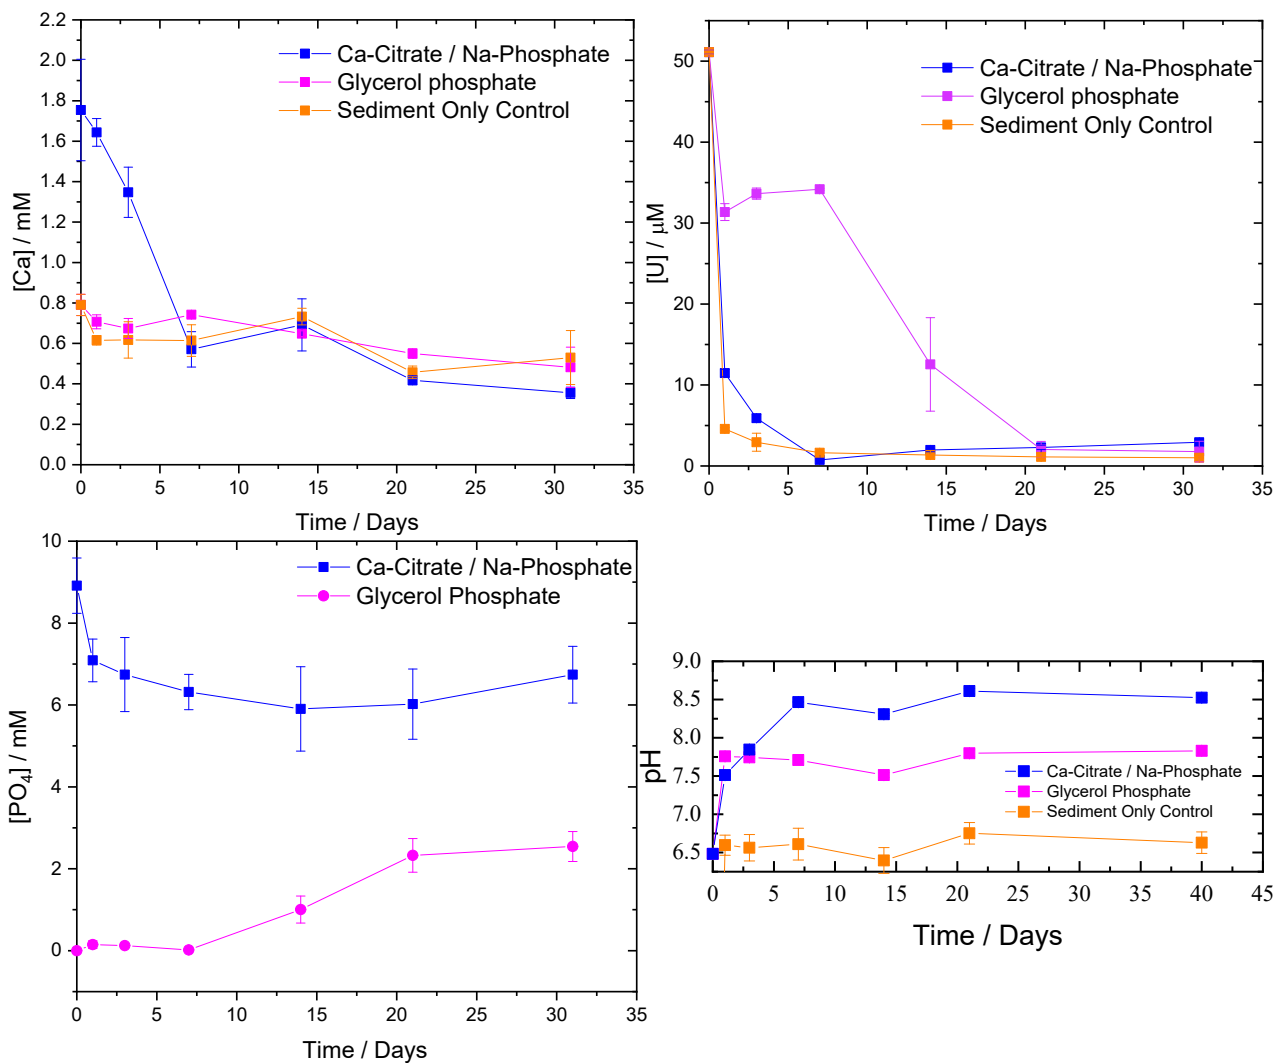

## Section S.2: Aqueous Geochemical Data for Calder River Water Experiment

Figure S2 Aqueous geochemical data from Calder River water microcosms amended with 1 mM Ca<sup>2+</sup>, 2.5 mM Citrate with 10 mM phosphate, 10 mM glycerol phosphate and a sediment only sorption control. Microcosms were run in triplicate with error bars representing ± one standard deviation.

## Section S3: 16S rRNA Microbial Community Analysis

### Synthetic Groundwater Experiments

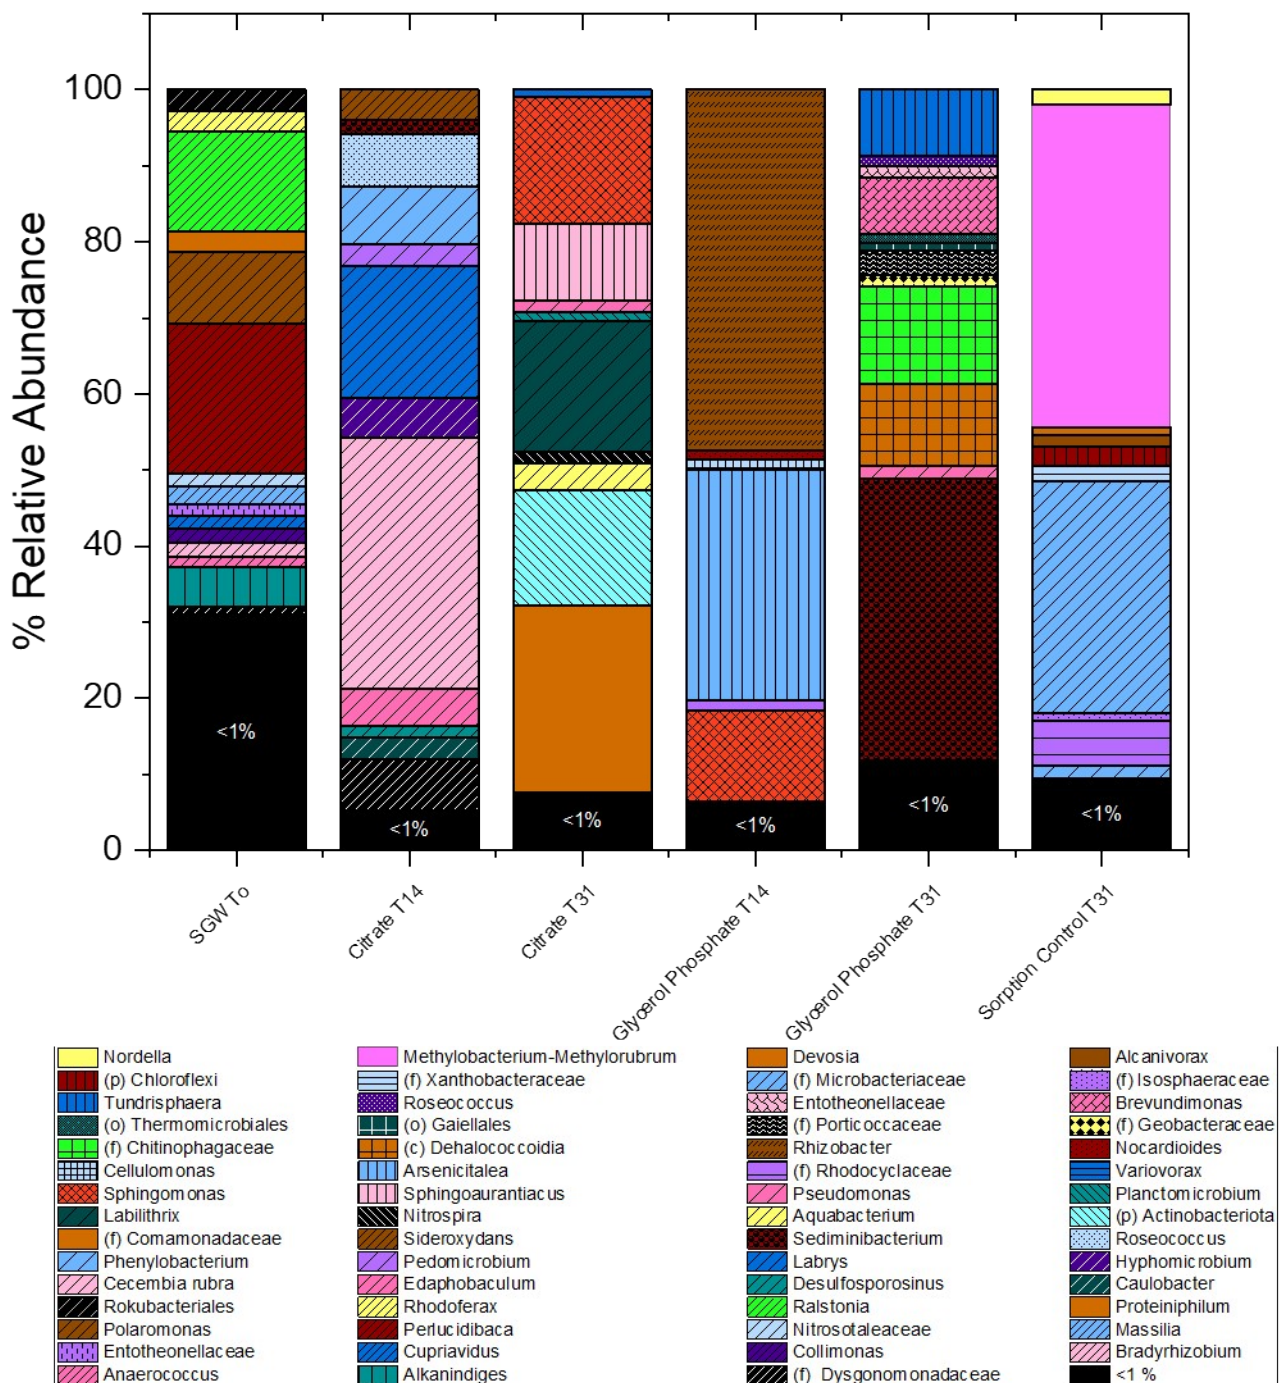

Figure S3 Data showing the microbial community structure at Genus level (>1% relative abundance) for synthetic groundwater sediment end points after 14 and 31 days of treatment with 1 mM Ca<sup>2+</sup>, 2.5 mM citrate and 10 mM phosphate, 10 mM glycerol phosphate and sediment only control (sorption control). The initial starting peel place quarry (PPQ) sediment is also shown. Data is presented to the genus level, where the genus cannot be identified the family (f), order (o), phylum (p) or class (c) is given.

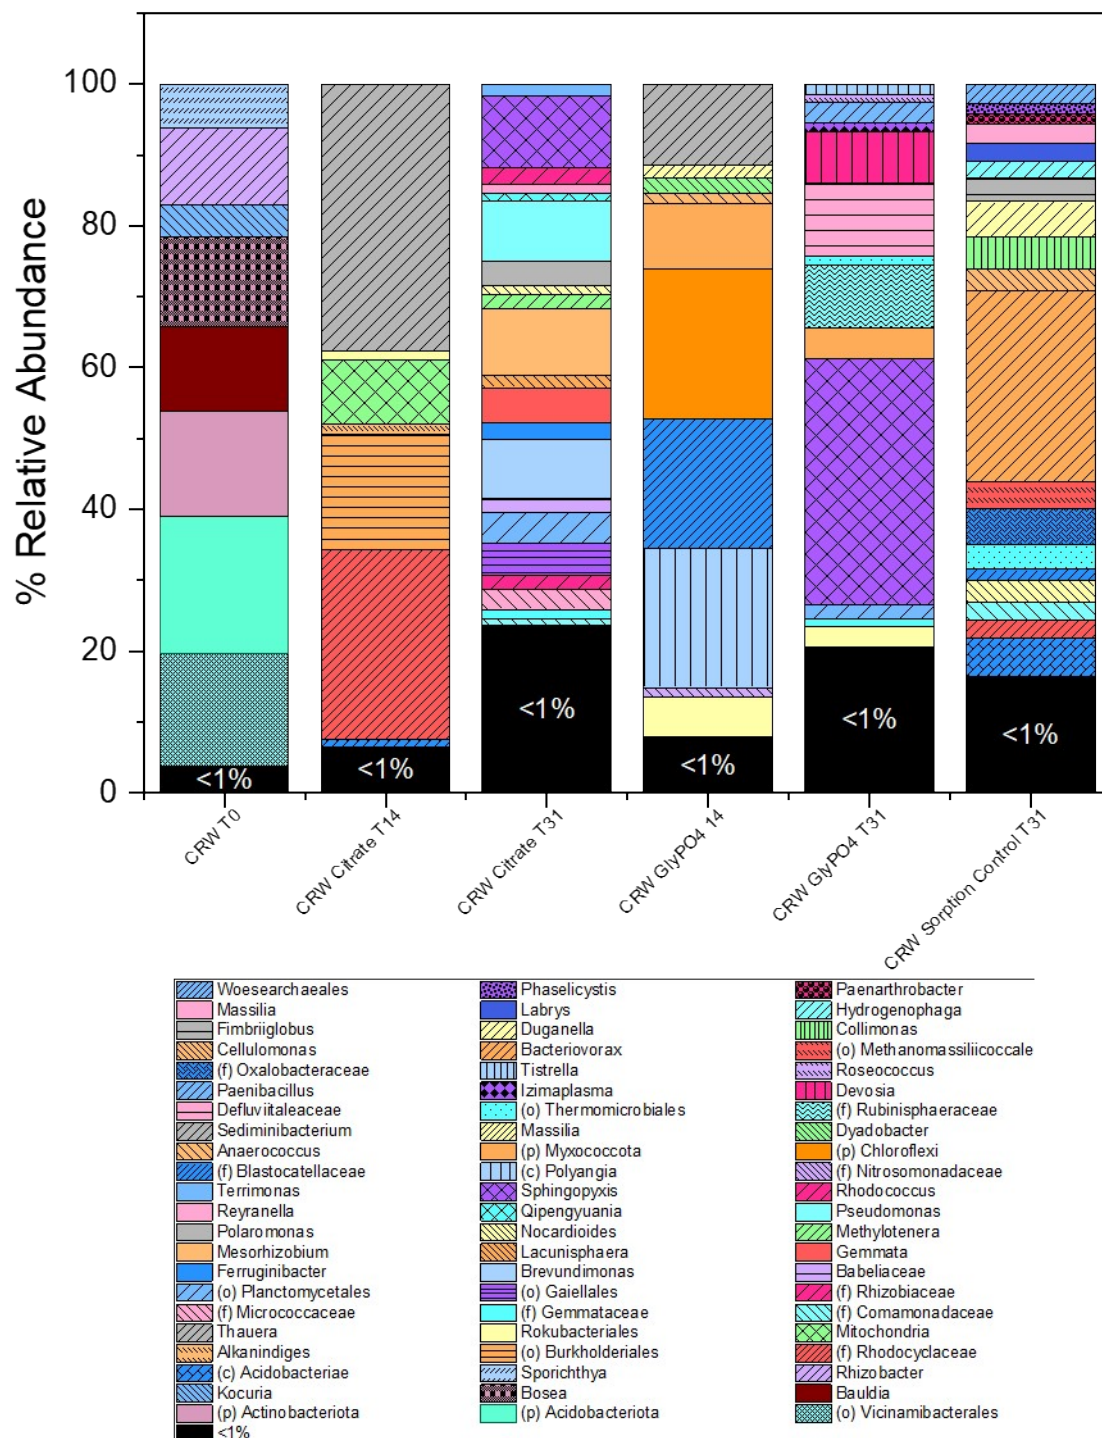

Figure S4 Data showing the microbial community structure at Genus level (>1% relative abundance) for Calder River water sediment end points after 14 and 31 days of treatment with 1 mM Ca<sup>2+</sup>, 2.5 mM citrate and 10 mM phosphate, 10 mM glycerol phosphate and sediment only control (sorption control). The initial starting peel place quarry (PPQ) sediment is also shown. Data is presented to the genus level, where the genus cannot be identified the family (f), order (o), phylum (p) or class (c) is given.

### Calder River water Experiments

Table S2 Shannon Diversity Index (H) of microbial communities from sediment samples and corresponding DNA yield in extracts prior to PCR amplification (measured using Qubit). Calder River water (CRW). Time (T) given in days. Synthetic Groundwater (SGW).

| <b>Sample</b>                             | <b>Shannon<br/>Diversity<br/>Index (H)</b> | <b>Extract Conc ng/ul</b> |
|-------------------------------------------|--------------------------------------------|---------------------------|
| <b>Synthetic Groundwater<br/>(SGW) T0</b> | 3.7                                        | 0.02                      |
| <b>SGW Citrate T14</b>                    | 2.3                                        | 0.52                      |
| <b>SHW Citrate T31</b>                    | 2.3                                        | 3.04                      |
| <b>SGW Glycerol Phosphate T14</b>         | 1.6                                        | 0.17                      |
| <b>SGW Glycerol Phosphate T31</b>         | 2.4                                        | 2.58                      |
| <b>SGW Sediment Only Control T31</b>      | 3.3                                        | 0.01                      |
| <b>CRW T0</b>                             | 2.3                                        | Below L.O.D               |
| <b>CRW Citrate T14</b>                    | 1.8                                        | 7.38                      |
| <b>CRW Citrate T31</b>                    | 3.8                                        | 0.498                     |
| <b>CRW GlyPO4 T14</b>                     | 1.6                                        | 0.169                     |
| <b>CRW GlyPO4 T31</b>                     | 2.8                                        | 1.07                      |
| <b>CRW Sediment Only Control T31</b>      | 3.3                                        | 0.0114                    |



## Section S4: XAS Results and Fitting Table

U L<sub>III</sub> EXAFS Fitting parameters for the sediment endpoints from sediment only control, Ca-citrate/Na-phosphate (1 mM Ca<sup>2+</sup>, 2.5 mM citrate and 10 mM phosphate) and glycerol phosphate treatments. Additional EXFAS analysis for solution sample 14 days after amendment glycerol phosphate and uranyl orthophosphate standard. N is shell occupancy, R(Å) is interatomic distance,  $\sigma^2$  (Å<sup>2</sup>) is the Debye-Waller factor, S<sub>0</sub><sup>2</sup> amplitude factor, R (least squared residual) goodness of fit factor,  $\Delta E_0$  denotes the energy shift (calculated) from the fermi level and  $\alpha$  denotes the statistical significance of each shell from the F-test, determined from whether the fit was significantly worsened on removal of an individual shell.(6)

Table S3 U L<sub>III</sub> EXAFS Fitting parameters for the sediment microcosms sediment only control, Ca-citrate/Na-phosphate (1 mM Ca<sup>2+</sup>, 2.5 mM citrate and 10 mM phosphate), glycerol phosphate amended, uranyl orthophosphate standard and glycerol phosphate solution phase at 14 day.

| Treatment                       | Scattering Path   | N   | R (Å)        | $\sigma^2$ (Å <sup>2</sup> ) | S <sub>0</sub> <sup>2</sup> | R-factor | $\Delta E_0$ | F-Test ( $\alpha$ ) % |
|---------------------------------|-------------------|-----|--------------|------------------------------|-----------------------------|----------|--------------|-----------------------|
| <b>Sediment Only Control</b>    | U-O <sub>ax</sub> | 2   | 1.81 ± 0.01  | 0.004 ± 0.001                | 0.90                        | 0.012    | 8.42         | 100                   |
|                                 | U-O <sub>eq</sub> | 3   | 2.29 ± 0.03  | 0.006 ± 0.002                | 0.90                        |          |              | 100                   |
|                                 | U-O <sub>eq</sub> | 3   | 2.47 ± 0.03  | 0.005 ± 0.002                | 0.90                        |          |              | 100                   |
|                                 | U-C               | 1.7 | 2.95 ± 0.05  | 0.010 ± 0.009                | 0.90                        |          |              | 89                    |
|                                 | U-Fe              | 0.5 | 3.45 ± 0.05  | 0.008 ± 0.005                | 0.90                        |          |              | 92                    |
| <b>Ca-citrate/Na- phosphate</b> | U-O <sub>ax</sub> | 2   | 1.81 ± 0.006 | 0.003 ± 0.0006               | 1.0                         | 0.016    | 10.4         | 100                   |
|                                 | U-O <sub>eq</sub> | 2.3 | 2.30 ± 0.014 | 0.0011 ± 0.001               | 1.0                         |          |              | 100                   |
|                                 | U-O <sub>eq</sub> | 2.7 | 2.44 ± 0.010 | 0.003 ± 0.0015               | 1.0                         |          |              | 100                   |

|                                                  |                   |     |              |                 |     |        |      |     |
|--------------------------------------------------|-------------------|-----|--------------|-----------------|-----|--------|------|-----|
|                                                  | U-P               | 1.0 | 3.13 ± 0.018 | 0.003 ± 0.0020  | 1.0 |        |      | 100 |
|                                                  | U-P               | 2.0 | 3.66 ± 0.023 | 0.005 ± 0.0025  | 1.0 |        |      | 100 |
|                                                  | U-U               | 1.3 | 4.00 ± 0.036 | 0.007 ± 0.0038  | 1.0 |        |      | 93  |
| <b>Glycerol Phosphate</b>                        | U-Oax             | 2   | 1.80 ± 0.010 | 0.003 ± 0.0009  | 1.0 | 0.019  | 9.9  | 100 |
|                                                  | U-O <sub>eq</sub> | 2.7 | 2.32 ± 0.015 | 0.002 ± 0.0014  | 1.0 |        |      | 100 |
|                                                  | U-O <sub>eq</sub> | 2.3 | 2.47 ± 0.025 | 0.004 ± 0.0027  | 1.0 |        |      | 100 |
|                                                  | U-P               | 1.0 | 3.14 ± 0.023 | 0.003 ± 0.0026  | 1.0 |        |      | 99  |
|                                                  | U-P               | 2.0 | 3.71 ± 0.048 | 0.009 ± 0.0057  | 1.0 |        |      | 88  |
|                                                  | U-U               | 1.3 | 4.00 ± 0.053 | 0.007 ± 0.0055  | 1.0 |        |      | 70  |
| <b>Uranyl Orthophosphate Standard</b>            | U-Oax             | 2.0 | 1.78 ± 0.05  | 0.0018 ± 0.0004 | 0.9 | 0.0080 | 9.5  |     |
|                                                  | U-O <sub>eq</sub> | 8/3 | 2.33 ± 0.010 | 0.0024 ± 0.0010 | 0.9 |        |      |     |
|                                                  | U-O <sub>eq</sub> | 7/3 | 2.48 ± 0.013 | 0.0022 ± 0.0013 | 0.9 |        |      |     |
|                                                  | U-P               | 1.0 | 3.18 ± 0.021 | 0.0039 ± 0.0024 | 0.9 |        |      |     |
|                                                  | U-P               | 1.2 | 3.59 ± 0.039 | 0.0047 ± 0.0038 | 0.9 |        |      |     |
|                                                  | U-P               | 2   | 3.82 ± 0.033 | 0.0058 ± 0.0034 | 0.9 |        |      |     |
|                                                  | U-U               | 4/3 | 4.02 ± 0.010 | 0.0016 ± 0.0008 | 0.9 |        |      |     |
| <b>Glycerol Phosphate Solution Phase 14 Days</b> | U-Oax             | 2   | 1.84 ± 0.080 | 0.0049 ± 0.001  | 0.9 | 0.0079 | 13.5 | 100 |
|                                                  | U-O <sub>eq</sub> | 6   | 2.47 ± 0.010 | 0.0089 ± 0.001  | 0.9 |        |      | 100 |
|                                                  | U-C               | 3   | 2.92 ± 0.013 | 0.0027 ± 0.002  | 0.9 |        |      | 100 |
|                                                  | U-O-U-O MS        | 2   | 3.67         | 0.0099          | 0.9 |        |      |     |
|                                                  | U-O-O MS          | 2   | 3.73         | 0.0099          | 0.9 |        |      |     |

|  |      |   |                 |                     |     |  |  |    |
|--|------|---|-----------------|---------------------|-----|--|--|----|
|  | U-P  | 1 | $3.27 \pm 0.02$ | $0.0030 \pm 0.0026$ | 0.9 |  |  | 99 |
|  | U-Ca | 2 | $4.05 \pm 0.02$ | $0.0061 \pm 0.003$  | 0.9 |  |  | 99 |

### XAS Spectra and EXAFS Fitting Glycerol Phosphate Aqueous Phase (T<sub>14</sub>)

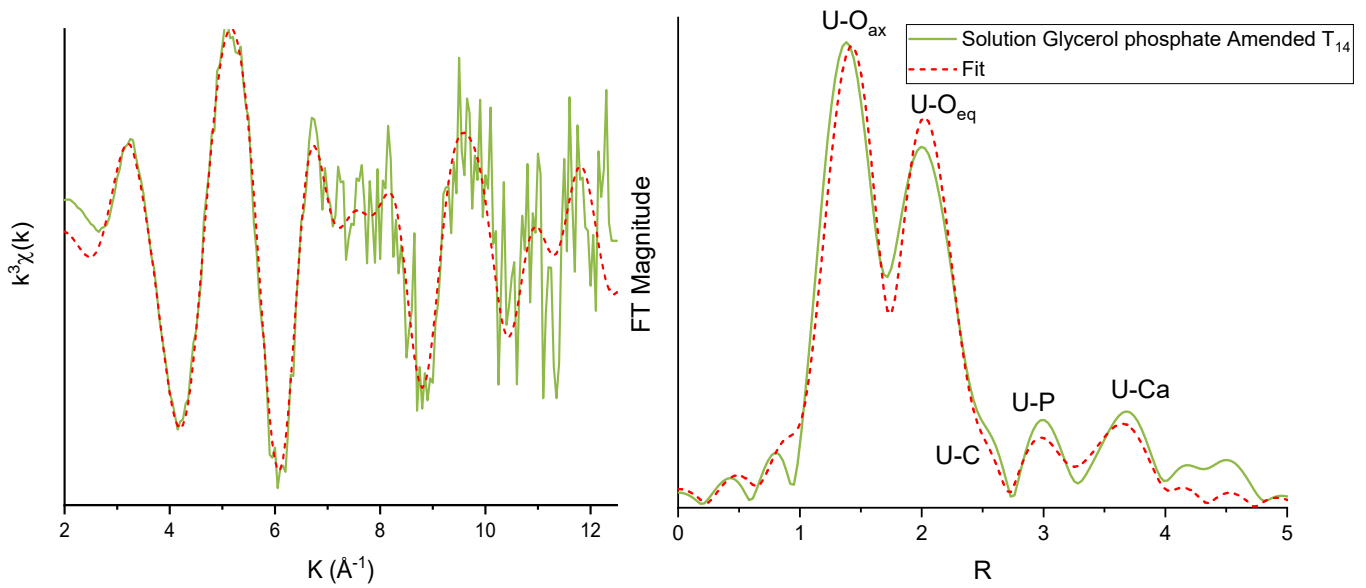

Figure S5 U L<sub>III</sub> EXAFS synthetic groundwater solution sample 14 day post treatment with 10 mM glycerol phosphate.

### XANES Spectra from microcosm experiments

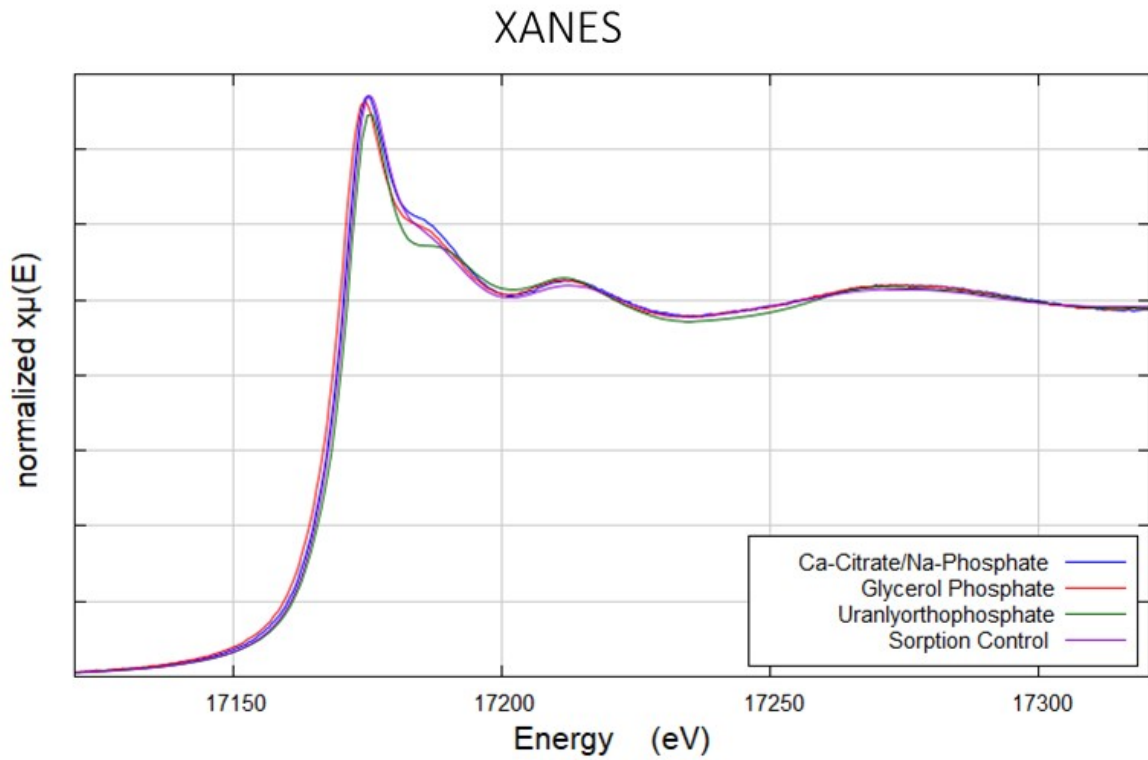

Figure S6 XANES spectra for uranyl orthophosphate standard and sediments after 31 days of treatment with Ca-citrate / Na-phosphate, glycerol phosphate and sediment only control (sorption control).

### Section S5 XRD Analysis of Uranyl Orthophosphate Standard

Uranyl orthophosphate was synthesised following from the method of S. Yagoubi et al (7) briefly, 0.375 g of uranyl nitrate were dissolved in 5 ml of DIW, before the addition of 1.9 ml of phosphoric acid (0.17 M). The solution was stirred at 70°C until complete evaporation and formation of a yellow solid. After, several washes with DIW the solid was ground to a fine powder with a pestle and mortar, before drying overnight. The dried powder was suspended in isopropanol, before being transferred to XRD sample holder. XRD analysis was conducted using a Bruker D2 PHASER. The synthesised mineral was confirmed as uranyl orthophosphate ( $(\text{UO}_2)_3(\text{PO}_4)_2(\text{H}_2\text{O})_4$ ) by comparison to previous XRD spectra from the literature generated using VESTA software and CIF file from Locock et al 2002.(8)

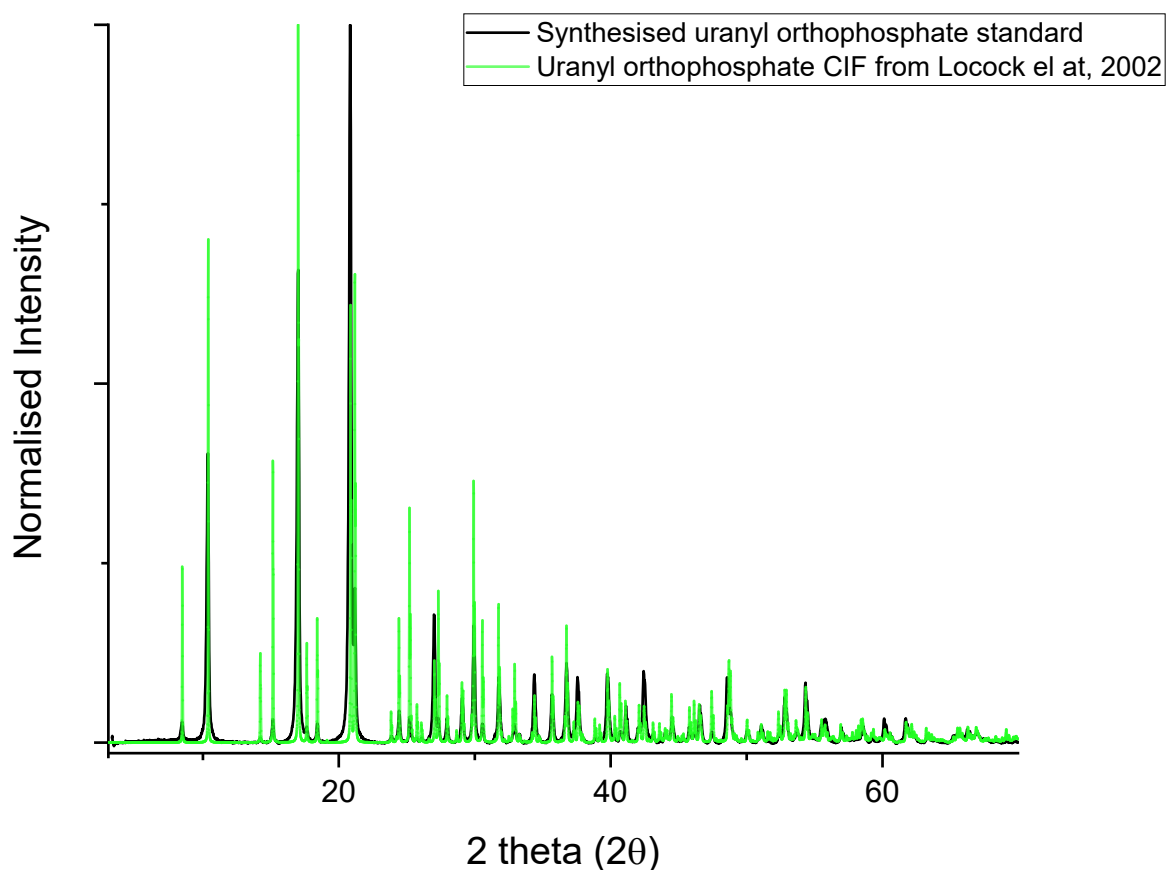

Figure S7 XRD from uranyl orthophosphate standard synthesised from the method of S. Yagoubi et al, 2013 and CIF file from Locock et al , 2002.

## Section S6: Supporting Information References

1. Parkhurst DL, Appelo CAJ. Description of input and examples for PHREEQC version 3: a computer program for speciation, batch-reaction, one-dimensional transport, and inverse geochemical calculations [Internet]. Techniques and Methods. Reston, VA; 2013. Available from: <http://pubs.er.usgs.gov/publication/tm6A43>
2. Giffaut E, Grivé M, Blanc P, Vieillard P, Colàs E, Gailhanou H, et al. Andra thermodynamic database for performance assessment: ThermoChimie. Appl Geochemistry [Internet]. 2014;49:225–36. Available from: <http://dx.doi.org/10.1016/j.apgeochem.2014.05.007>
3. Robinson C, Shaw S, Lloyd JR, Graham J, Morris K. Phosphate (Bio)mineralization Remediation of <sup>90</sup>Sr-Contaminated Groundwaters. Environ Sci Technol Water. 2023;
4. Gorman-Lewis D, Shvareva T, Kubatko KA, Burns PC, Wellman DM, Mcnamara B, et al. Thermodynamic properties of autunite, uranyl hydrogen phosphate, and uranyl orthophosphate from solubility and calorimetric measurements. Environ Sci Technol. 2009;43(19):7416–22.
5. Koban A, Bernhard G. Complexation of uranium(VI) with glycerol 1-phosphate. Polyhedron. 2004;23(10):1793–7.
6. Downward L, Booth CH, Lukens WW, Bridges F. A variation of the F-test for determining statistical relevance of particular parameters in EXAFS fits. AIP Conf Proc. 2007;882(February 2007):129–31.
7. Yagoubi S, Renard C, Abraham F, Obbade S. Molten salt flux synthesis and crystal structure of a new open-framework uranyl phosphate Cs<sub>3</sub>(UO<sub>2</sub>)<sub>2</sub>(PO<sub>4</sub>)<sub>2</sub>O<sub>2</sub>: Spectroscopic characterization and cationic mobility studies. J Solid State Chem [Internet]. 2013;200:13–21.

Available from: <http://dx.doi.org/10.1016/j.jssc.2013.01.013>

8. Locock AJ, Burns PC. Crystal structures of three framework alkali metal uranyl phosphate hydrates. *J Solid State Chem.* 2002;167(1):226–36.
